# Supplementary material for: Human β-Defensin 3 Inhibits Porphyromonas Gingivalis Lipopolysaccharide-Induced Oxidative and Inflammatory Responses of Microglia by Suppression of Cathepsins B and L
Source: MDPI journal article supplement (doi:10.3390/ijms232315099), 2022-12-01
Supplement: s1 [file s1]

hBD1 :        D H Y N C V S S G G Q C L Y S A C P I F T K I Q G T C Y R G K A K C C K  
hBD2 :        G I G D P V T C L K S G A I C H P V F C P R R Y K Q I G T C G L P G T K C C K K P  
hBD3 :        G I I N T L Q K Y Y C R V R G G R C A V L S C L P K E E Q I G K C S T R G R K C C R R K K  
hBD4 :        E F E L D R I C G Y G T A R C R K K C R S Q E Y R I G R C P N T Y A C C L R K W D E S L L N R T K P

**Supplementary Figure S1.** Amino acid sequences of hBD1-4. Cationic amino acids (R, L, H) are colored with red. Hydrophobic amino acids (G, A, V, L, I, P, F) are colored with blue. Cysteine residues are colored with brown.
